# Supplementary material for: C–N bond hydrogenolysis of aniline and cyclohexylamine over TaOx–Al2O3
Source: Royal Society of Chemistry journal article supplement (doi:10.1039/c6nj01076h), 2016-01-01
Supplement: c6nj01076h1.pdf [file c6nj01076h1.pdf]

## Supporting Information

for

### C-N bond hydrogenolysis of aniline and cyclohexylamine over TaO<sub>x</sub>-Al<sub>2</sub>O<sub>3</sub>

Mark Bachrach, Tobin J. Marks, and Justin M. Notestein

**Table S1.** Product Distribution for the Denitrogenation of Cyclohexylamine

| T (°C)       | Product Distribution |              |             |             |                  | Benzene/cyclohexane             |      |                      |
|--------------|----------------------|--------------|-------------|-------------|------------------|---------------------------------|------|----------------------|
|              | Benzene              | Cyclohexene  | Cyclohexane | Aniline     | Cyclohexyl-amine | HC/NH <sub>2</sub> <sup>a</sup> | Obs. | Equil. <sup>b</sup>  |
| 150          | 4.7%                 | 2.4%         | 0.1%        | 0.3%        | 1.1%             | 5                               | 65   | 7.1x10 <sup>-7</sup> |
| 200          | 4.5%                 | 6.9%         | 0.1%        | 0.1%        | 0.7%             | 14                              | 31   | 4.4x10 <sup>-4</sup> |
| 250          | 10.1%                | 30.3%        | 0.4%        | 0.2%        | 0.4%             | 67                              | 25   | 8.1x10 <sup>-2</sup> |
| 300          | 7.4%                 | 28.9%        | 0.1%        | 0.0%        | 0.1%             | 274                             | 51   | 6.0                  |
| 350          | 0.5%                 | 0.0%         | 0.0%        | 0.0%        | 0.0%             | 11                              | n/a  | 220                  |
| 400          | 0.6%                 | 0.0%         | 0.0%        | 0.0%        | 0.0%             | 20                              | n/a  | 4700                 |
| <b>Total</b> | <b>27.7%</b>         | <b>68.5%</b> | <b>0.8%</b> | <b>0.7%</b> | <b>2.3%</b>      | 32                              | 36   | 23                   |

<sup>a</sup>Moles C-N bond cleavage products (cyclohexane, cyclohexene, benzene) detected per mole cyclohexylamine and aniline desorbed in a given temperature range.

<sup>b</sup>Equilibrium ratios at a given temperature were calculated based on the thermodynamic data for the hydrogenation of benzene to cyclohexene and cyclohexane by G. G. Janz, *J. Chem. Phys.*, **1954**, 22, 751.

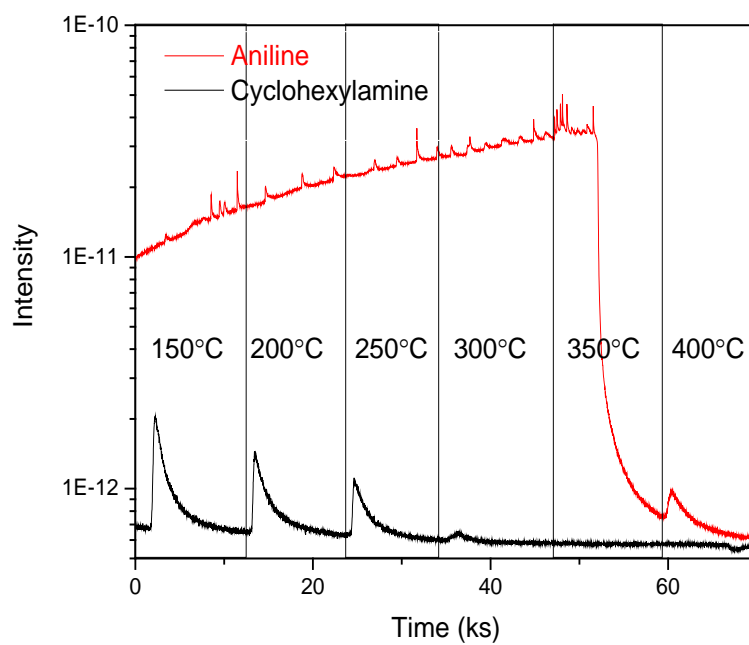

**Figure S1.** Signals from process mass spectrometry for aniline ( $m/z = 93$ ) and cyclohexylamine ( $m/z = 99$ ) desorbing **intact** from  $\text{TaO}_x\text{-Al}_2\text{O}_3$  surfaces saturated in the respective amines.
